# Supplementary material for: Enhanced bed shear stress and mixing in the near wake of an offshore wind turbine monopile
Source: Copernicus journal article supplement (doi:10.5194/egusphere-2024-2056), 2024-07-15

Figure 1:

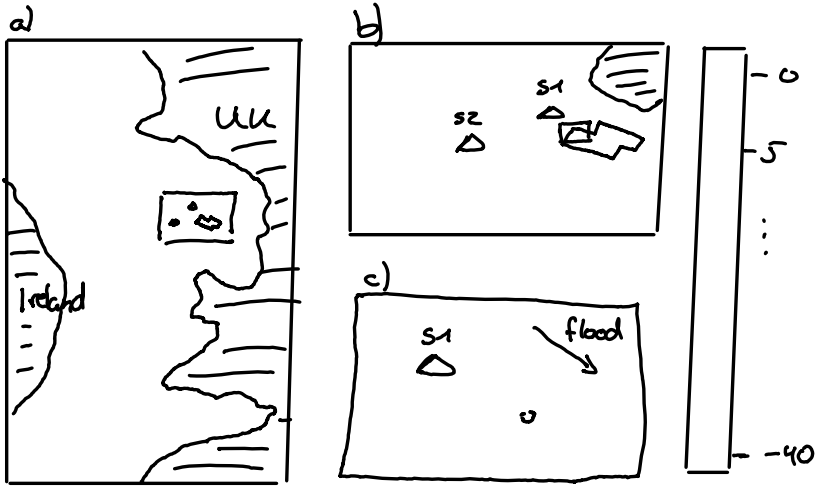

Figure 2:

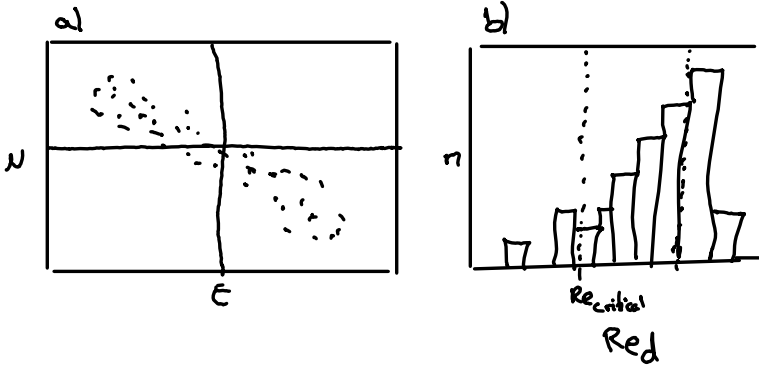

Supplement: Supplementary file [file egusphere-2024-2056-RC1-supplement.pdf]
